# Supplementary material for: Cooperation of σ–π and σ*–π* Conjugation in the UV/Vis and Fluorescence Spectra of 9,10-Disilylanthracene
Source: MDPI journal article supplement (doi:10.3390/molecules27072241), 2022-03-30
Supplement: s1 [file s1]

## **Supplementary Materials**

### **Cooperation of $\sigma$ - $\pi$ and $\sigma^*$ - $\pi^*$ Conjugation in the UV/Vis and Fluorescence Spectra of 9,10-Disilylanthracene**

**Soichiro Kyushin \* and Yuya Suzuki**

#### **Contents**

1. Theoretical calculations

## 1. Theoretical calculations

All theoretical calculations were performed by using Gaussian 09 [45] and 16 [46] on a Fujitsu PRIMERGY RX300 system of the Research Center for Computational Science, Japan. The structures of the  $S_0$  and  $S_1$  states of **1** and anthracene were optimized at the B3LYP/6-31G(d) and TD-DFT B3LYP/6-31G(d) levels, respectively, and the optimization was confirmed by frequency calculations. The results are summarized in Tables S1 and S2. Transition properties of **1** and anthracene were calculated at the TD-DFT B3LYP/6-31G(d) level by using the optimized structures. The results are summarized in Tables S3 and S4. Vibrationally resolved UV/Vis and fluorescence spectra of anthracene were calculated by using the frequency data of the optimized structures of the  $S_0$  and  $S_1$  states. The results are shown in Figure S3. Unfortunately, similar calculations of vibrationally resolved UV/Vis and fluorescence spectra of **1** failed.

**Table S1.** Atomic coordinates of the optimized structures of the  $S_0$  states of **1** and anthracene.

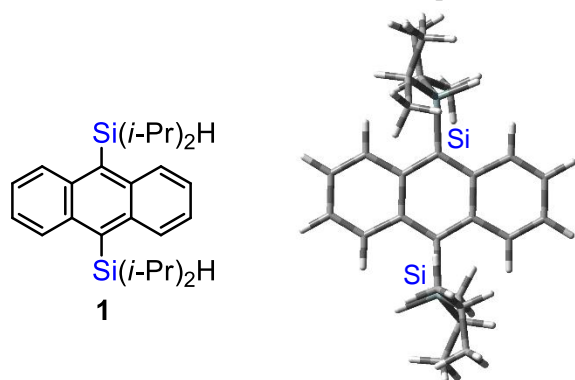

| Atomic<br>Type | Coordinates (Angstroms) |            |            |
|----------------|-------------------------|------------|------------|
|                | X                       | Y          | Z          |
| C              | -0.1053590              | -3.7022510 | -0.5498870 |
| C              | -0.9712340              | -2.6511180 | -0.4133160 |
| C              | -0.5258440              | -1.3072810 | -0.1718110 |
| C              | 0.9078910               | -1.0836710 | -0.0886570 |
| C              | 1.7687500               | -2.2234690 | -0.2306360 |
| C              | 1.2925970               | -3.4872880 | -0.4503490 |
| C              | -1.4337660              | -0.2262350 | -0.0080050 |
| C              | 1.4433290               | 0.2114400  | 0.1402690  |
| C              | 0.5346970               | 1.2771940  | 0.3775410  |
| C              | -0.8994170              | 1.0539200  | 0.2973740  |
| C              | -1.7597510              | 2.1777330  | 0.5366590  |
| H              | -2.8324540              | 2.0404020  | 0.4738470  |
| C              | -1.2830760              | 3.4212400  | 0.8508490  |

|    |            |            |            |
|----|------------|------------|------------|
| C  | 0.1156190  | 3.6331580  | 0.9484880  |
| C  | 0.9816110  | 2.5994390  | 0.7152520  |
| H  | -0.4901840 | -4.7031250 | -0.7259230 |
| H  | -2.0329930 | -2.8417700 | -0.4814810 |
| H  | 2.8395750  | -2.0866640 | -0.1370850 |
| H  | 1.9816590  | -4.3225640 | -0.5412670 |
| H  | -1.9733540 | 4.2412690  | 1.0292960  |
| H  | 0.4997430  | 4.6156140  | 1.2093120  |
| H  | 2.0439790  | 2.7823140  | 0.7977500  |
| Si | 3.3437660  | 0.4620070  | 0.0112040  |
| H  | 3.6783610  | 1.9034570  | 0.1796020  |
| Si | -3.3393200 | -0.4283340 | -0.1564660 |
| H  | -3.6671080 | -1.8042100 | -0.6226590 |
| C  | 3.9182170  | 0.0338480  | -1.7694040 |
| H  | 3.6143420  | -0.9996070 | -1.9847260 |
| C  | 5.4477280  | 0.1193190  | -1.9280720 |
| H  | 5.9736630  | -0.5880460 | -1.2764910 |
| H  | 5.7434320  | -0.1059290 | -2.9619640 |
| H  | 5.8210590  | 1.1255540  | -1.6979020 |
| C  | 3.2142310  | 0.9455360  | -2.7936880 |
| H  | 2.1239250  | 0.8515680  | -2.7448480 |
| H  | 3.4650980  | 2.0011450  | -2.6282730 |
| H  | 3.5245670  | 0.6930200  | -3.8168120 |
| C  | 4.3269250  | -0.4527530 | 1.3917440  |
| H  | 4.6282550  | -1.4341330 | 0.9939320  |
| C  | 3.4882180  | -0.6979880 | 2.6607520  |
| H  | 3.1368080  | 0.2459520  | 3.0965590  |
| H  | 2.6068470  | -1.3148730 | 2.4596900  |
| H  | 4.0872300  | -1.2065450 | 3.4284320  |
| C  | 5.6160390  | 0.3175100  | 1.7446320  |
| H  | 6.2034600  | -0.2317190 | 2.4930030  |
| H  | 6.2603230  | 0.4801940  | 0.8738570  |
| H  | 5.3832310  | 1.3018760  | 2.1688120  |
| C  | -4.1360020 | -0.2688020 | 1.5833900  |
| H  | -3.8060770 | 0.6876310  | 2.0132740  |
| C  | -4.1092430 | 0.7173800  | -1.4990270 |
| H  | -4.3868180 | 1.6709920  | -1.0256390 |
| C  | -3.6218970 | -1.3904230 | 2.5079840  |
| H  | -3.9165410 | -2.3801150 | 2.1361120  |
| H  | -2.5300950 | -1.3809720 | 2.5987060  |
| H  | -4.0401590 | -1.2841200 | 3.5181190  |
| C  | -5.6752710 | -0.2606280 | 1.5440960  |
| H  | -6.0889800 | -0.1966640 | 2.5599120  |

|   |            |            |            |
|---|------------|------------|------------|
| H | -6.0706650 | 0.5891260  | 0.9761400  |
| H | -6.0725020 | -1.1780220 | 1.0910800  |
| C | -5.3992670 | 0.0905440  | -2.0684360 |
| H | -6.1473590 | -0.1131290 | -1.2950140 |
| H | -5.8608320 | 0.7614060  | -2.8057310 |
| H | -5.1858190 | -0.8577750 | -2.5765540 |
| C | -3.1259760 | 1.0281460  | -2.6441540 |
| H | -2.2371130 | 1.5605710  | -2.2927950 |
| H | -2.7876560 | 0.1093710  | -3.1403410 |
| H | -3.6095810 | 1.6501040  | -3.4097680 |

-----  
Framework group  $C_1$ , energy: -1592.68649600 a.u.

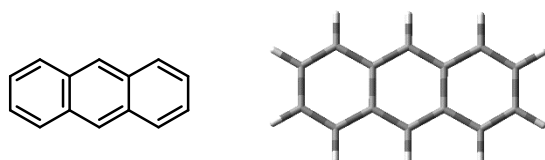

| Atomic Type | Coordinates (Angstroms) |            |            |
|-------------|-------------------------|------------|------------|
|             | X                       | Y          | Z          |
| -----       |                         |            |            |
| C           | 0.0000000               | 3.6606800  | 0.7131450  |
| C           | 0.0000000               | 2.4795300  | 1.4070360  |
| C           | 0.0000000               | 1.2239230  | 0.7226250  |
| C           | 0.0000000               | 1.2239230  | -0.7226250 |
| C           | 0.0000000               | 2.4795300  | -1.4070360 |
| C           | 0.0000000               | 3.6606800  | -0.7131450 |
| C           | 0.0000000               | 0.0000000  | 1.4033770  |
| C           | 0.0000000               | 0.0000000  | -1.4033770 |
| C           | 0.0000000               | -1.2239230 | -0.7226250 |
| C           | 0.0000000               | -1.2239230 | 0.7226250  |
| C           | 0.0000000               | -2.4795300 | 1.4070360  |
| H           | 0.0000000               | -2.4768690 | 2.4945800  |
| C           | 0.0000000               | -3.6606800 | 0.7131450  |
| C           | 0.0000000               | -3.6606800 | -0.7131450 |
| C           | 0.0000000               | -2.4795300 | -1.4070360 |
| H           | 0.0000000               | 0.0000000  | 2.4917480  |
| H           | 0.0000000               | 4.6073590  | 1.2466580  |
| H           | 0.0000000               | 2.4768690  | 2.4945800  |
| H           | 0.0000000               | 2.4768690  | -2.4945800 |
| H           | 0.0000000               | 4.6073590  | -1.2466580 |
| H           | 0.0000000               | 0.0000000  | -2.4917480 |
| H           | 0.0000000               | -4.6073590 | 1.2466580  |

|   |           |            |            |
|---|-----------|------------|------------|
| H | 0.0000000 | -4.6073590 | -1.2466580 |
| H | 0.0000000 | -2.4768690 | -2.4945800 |

---

Framework group  $D_{2h}$ , energy: -539.53052354 a.u.

**Table S2.** Atomic coordinates of the optimized structures of the S<sub>1</sub> states of **1** and anthracene.

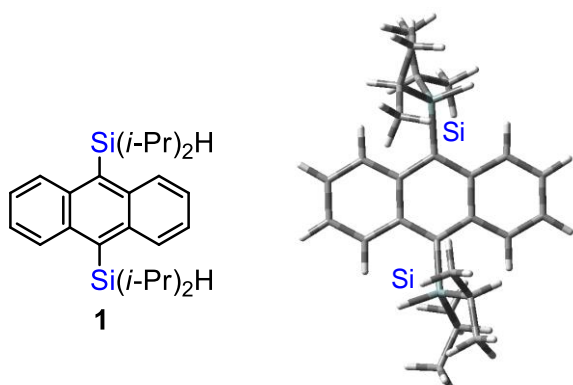

| Atomic<br>Type | Coordinates (Angstroms) |            |            |
|----------------|-------------------------|------------|------------|
|                | X                       | Y          | Z          |
| C              | -0.1131910              | 3.7942920  | -0.0975450 |
| C              | -0.9802800              | 2.6891990  | -0.0578770 |
| C              | -0.5248930              | 1.3515600  | -0.1168840 |
| C              | 0.9054040               | 1.1375670  | -0.2033120 |
| C              | 1.7446740               | 2.2730220  | -0.2541410 |
| C              | 1.2544730               | 3.5888740  | -0.2002890 |
| C              | -1.4235600              | 0.2253660  | -0.1083590 |
| C              | 1.4482860               | -0.1941900 | -0.2381630 |
| C              | 0.5469720               | -1.2858180 | -0.4919810 |
| C              | -0.8839110              | -1.0760460 | -0.4080060 |
| C              | -1.7218740              | -2.1929740 | -0.6287110 |
| H              | -2.7963180              | -2.0727230 | -0.5508850 |
| C              | -1.2301530              | -3.4686730 | -0.9529250 |
| C              | 0.1391790               | -3.6586250 | -1.0646370 |
| C              | 1.0066560               | -2.5774290 | -0.8345250 |
| H              | -0.5244320              | 4.7984810  | -0.0498820 |
| H              | -2.0423290              | 2.8797550  | 0.0240200  |
| H              | 2.8151130               | 2.1327150  | -0.3612420 |
| H              | 1.9461300               | 4.4251800  | -0.2413830 |
| H              | -1.9244910              | -4.2880340 | -1.1143530 |
| H              | 0.5492090               | -4.6309070 | -1.3219450 |
| H              | 2.0723410               | -2.7471600 | -0.9265310 |
| Si             | 3.2837220               | -0.4620140 | 0.1716060  |
| H              | 3.5252760               | -1.9231360 | 0.3486940  |
| Si             | -3.2856590              | 0.4056750  | 0.2437870  |
| H              | -3.5514610              | 1.7704020  | 0.7832630  |
| C              | 3.6772510               | 0.3365400  | 1.8742840  |

|   |            |            |            |
|---|------------|------------|------------|
| H | 3.4014630  | 1.3984080  | 1.8086880  |
| C | 5.1722500  | 0.2571780  | 2.2337900  |
| H | 5.8025900  | 0.7892020  | 1.5119550  |
| H | 5.3574970  | 0.7031370  | 3.2208910  |
| H | 5.5220230  | -0.7823350 | 2.2798270  |
| C | 2.8159510  | -0.3016740 | 2.9807480  |
| H | 1.7448940  | -0.2002500 | 2.7744500  |
| H | 3.0335270  | -1.3721600 | 3.0877980  |
| H | 3.0162400  | 0.1709880  | 3.9521830  |
| C | 4.4864970  | 0.1243340  | -1.2198850 |
| H | 4.7931700  | 1.1526810  | -0.9709800 |
| C | 3.8236090  | 0.1532970  | -2.6099600 |
| H | 3.4766330  | -0.8441880 | -2.9085310 |
| H | 2.9577880  | 0.8226160  | -2.6407850 |
| H | 4.5376270  | 0.4902560  | -3.3740930 |
| C | 5.7595300  | -0.7454360 | -1.2507270 |
| H | 6.4652710  | -0.3753810 | -2.0072840 |
| H | 6.2835830  | -0.7582970 | -0.2890300 |
| H | 5.5204500  | -1.7848740 | -1.5074270 |
| C | -4.2815860 | 0.2651090  | -1.3982680 |
| H | -3.9644360 | -0.6707620 | -1.8812940 |
| C | -3.9044530 | -0.7854480 | 1.6281070  |
| H | -4.2142060 | -1.7307890 | 1.1579220  |
| C | -3.9083970 | 1.4209190  | -2.3471150 |
| H | -4.2055860 | 2.3912220  | -1.9284190 |
| H | -2.8315110 | 1.4598200  | -2.5450370 |
| H | -4.4211570 | 1.3135350  | -3.3127820 |
| C | -5.8064120 | 0.1984780  | -1.1986560 |
| H | -6.3213930 | 0.1385800  | -2.1676480 |
| H | -6.1109990 | -0.6758030 | -0.6124400 |
| H | -6.1860950 | 1.0921670  | -0.6869910 |
| C | -5.1399060 | -0.1883690 | 2.3336970  |
| H | -5.9624240 | 0.0235530  | 1.6426800  |
| H | -5.5202680 | -0.8818320 | 3.0963560  |
| H | -4.8875220 | 0.7501610  | 2.8421850  |
| C | -2.8142530 | -1.1084490 | 2.6677540  |
| H | -1.9561820 | -1.6200680 | 2.2223410  |
| H | -2.4426740 | -0.1963440 | 3.1520160  |
| H | -3.2174000 | -1.7546990 | 3.4596960  |

---

Framework group  $C_1$ , energy: -1592.67806574 a.u.

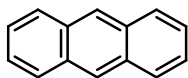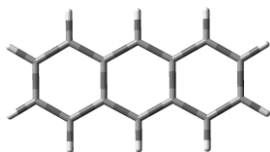

| Atomic<br>Type | Coordinates (Angstroms) |            |            |
|----------------|-------------------------|------------|------------|
|                | X                       | Y          | Z          |
| C              | 0.0000000               | 3.7018680  | 0.6951530  |
| C              | 0.0000000               | 2.4795660  | 1.3995530  |
| C              | 0.0000000               | 1.2441460  | 0.7219810  |
| C              | 0.0000000               | 1.2441460  | -0.7219810 |
| C              | 0.0000000               | 2.4795660  | -1.3995530 |
| C              | 0.0000000               | 3.7018680  | -0.6951530 |
| C              | 0.0000000               | 0.0000000  | 1.3971750  |
| C              | 0.0000000               | 0.0000000  | -1.3971750 |
| C              | 0.0000000               | -1.2441460 | -0.7219810 |
| C              | 0.0000000               | -1.2441460 | 0.7219810  |
| C              | 0.0000000               | -2.4795660 | 1.3995530  |
| H              | 0.0000000               | -2.4828400 | 2.4867650  |
| C              | 0.0000000               | -3.7018680 | 0.6951530  |
| C              | 0.0000000               | -3.7018680 | -0.6951530 |
| C              | 0.0000000               | -2.4795660 | -1.3995530 |
| H              | 0.0000000               | 0.0000000  | 2.4856690  |
| H              | 0.0000000               | 4.6383740  | 1.2452450  |
| H              | 0.0000000               | 2.4828400  | 2.4867650  |
| H              | 0.0000000               | 2.4828400  | -2.4867650 |
| H              | 0.0000000               | 4.6383740  | -1.2452450 |
| H              | 0.0000000               | 0.0000000  | -2.4856690 |
| H              | 0.0000000               | -4.6383740 | 1.2452450  |
| H              | 0.0000000               | -4.6383740 | -1.2452450 |
| H              | 0.0000000               | -2.4828400 | -2.4867650 |

Framework group  $D_{2h}$ , energy: -539.52275255 a.u.



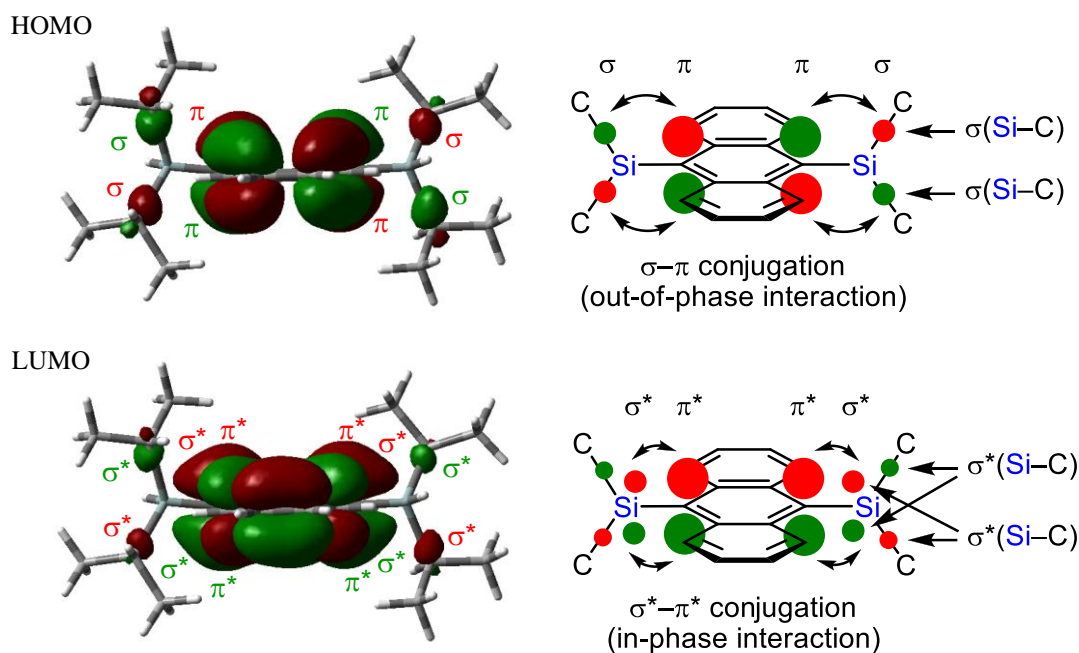

**Figure S1.** Side views of the HOMO (top) and LUMO (bottom) of the  $S_0$  state of **1** calculated at the B3LYP/6-31G(d) level. The isovalue is 0.02. The lobes of the  $\sigma(\text{Si-C})$  and  $\sigma^*(\text{Si-C})$  orbitals were explained in reference S3.

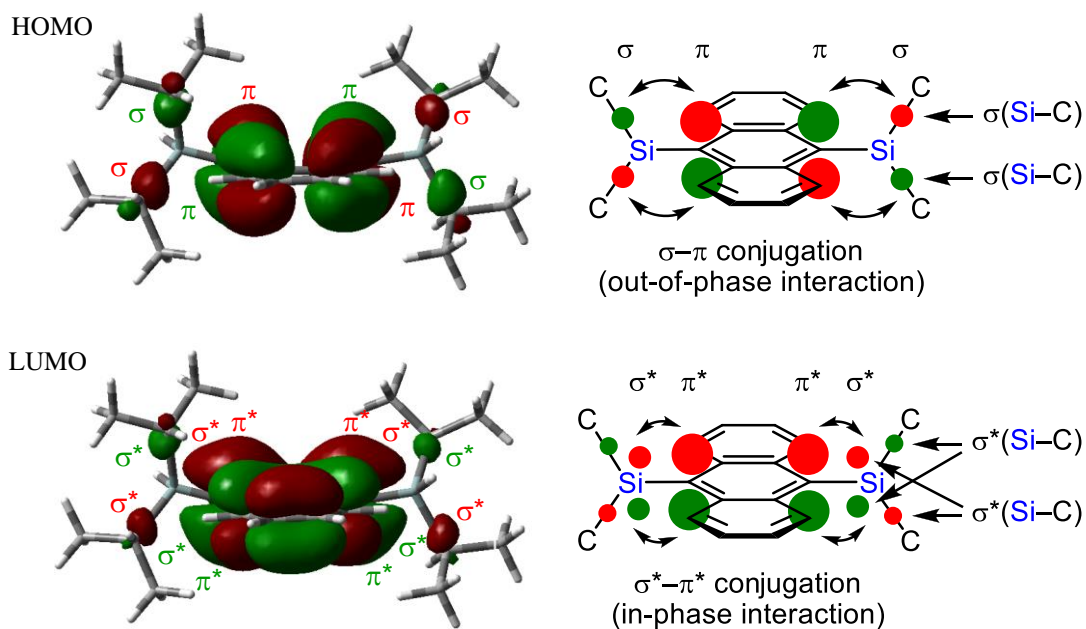

**Figure S2.** Side views of the HOMO (top) and LUMO (bottom) of the  $S_1$  state of **1** calculated at the B3LYP/6-31G(d) level. The isovalue is 0.02.

**Table S3.** Transition energies, wavelengths and oscillator strengths of the transitions of the optimized structures of the S<sub>0</sub> states of **1** and anthracene.

**Compound 1**<sup>1</sup>

|               |           |           |           |           |          |              |
|---------------|-----------|-----------|-----------|-----------|----------|--------------|
| Excited State | 1:        | Singlet-A | 3.0762 eV | 403.04 nm | f=0.1597 | <S**2>=0.000 |
|               | 111 ->112 | 0.70135   |           |           |          |              |
| Excited State | 2:        | Singlet-A | 3.8028 eV | 326.03 nm | f=0.0055 | <S**2>=0.000 |
|               | 110 ->112 | 0.53191   |           |           |          |              |
|               | 111 ->113 | 0.46336   |           |           |          |              |
| Excited State | 3:        | Singlet-A | 4.3671 eV | 283.90 nm | f=0.0000 | <S**2>=0.000 |
|               | 109 ->112 | 0.66369   |           |           |          |              |
|               | 111 ->114 | -0.23303  |           |           |          |              |
| Excited State | 4:        | Singlet-A | 4.6416 eV | 267.11 nm | f=0.0057 | <S**2>=0.000 |
|               | 104 ->112 | -0.11614  |           |           |          |              |
|               | 106 ->112 | 0.66357   |           |           |          |              |
|               | 107 ->112 | -0.20311  |           |           |          |              |
| Excited State | 5:        | Singlet-A | 4.6857 eV | 264.60 nm | f=0.0191 | <S**2>=0.000 |
|               | 108 ->112 | 0.65082   |           |           |          |              |
|               | 111 ->115 | 0.26685   |           |           |          |              |
| Excited State | 6:        | Singlet-A | 4.7872 eV | 258.99 nm | f=0.0007 | <S**2>=0.000 |
|               | 106 ->112 | 0.20267   |           |           |          |              |
|               | 107 ->112 | 0.66985   |           |           |          |              |
| Excited State | 7:        | Singlet-A | 4.8512 eV | 255.58 nm | f=0.0030 | <S**2>=0.000 |
|               | 109 ->112 | 0.21949   |           |           |          |              |
|               | 111 ->114 | 0.64705   |           |           |          |              |
| Excited State | 8:        | Singlet-A | 4.8627 eV | 254.97 nm | f=0.0936 | <S**2>=0.000 |
|               | 103 ->112 | -0.13155  |           |           |          |              |
|               | 108 ->112 | -0.24683  |           |           |          |              |
|               | 110 ->112 | 0.13244   |           |           |          |              |
|               | 111 ->113 | -0.16944  |           |           |          |              |
|               | 111 ->114 | -0.10557  |           |           |          |              |
|               | 111 ->115 | 0.59419   |           |           |          |              |
| Excited State | 9:        | Singlet-A | 5.0731 eV | 244.40 nm | f=1.1422 | <S**2>=0.000 |
|               | 110 ->112 | -0.44077  |           |           |          |              |
|               | 111 ->113 | 0.50079   |           |           |          |              |

|                                                                       |                                                         |           |           |          |              |  |
|-----------------------------------------------------------------------|---------------------------------------------------------|-----------|-----------|----------|--------------|--|
| 111 ->115                                                             | 0.18553                                                 |           |           |          |              |  |
| Excited State 10:<br>105 ->112                                        | Singlet-A<br>0.70063                                    | 5.2327 eV | 236.94 nm | f=0.0065 | <S**2>=0.000 |  |
| Excited State 11:<br>104 ->112<br>106 ->112                           | Singlet-A<br>0.69294<br>0.11745                         | 5.3649 eV | 231.10 nm | f=0.0059 | <S**2>=0.000 |  |
| Excited State 12:<br>102 ->112<br>109 ->113<br>110 ->114<br>111 ->116 | Singlet-A<br>-0.37017<br>0.46987<br>0.31687<br>-0.18111 | 5.5264 eV | 224.35 nm | f=0.0000 | <S**2>=0.000 |  |
| Excited State 13:<br>103 ->112<br>109 ->114<br>110 ->113<br>111 ->115 | Singlet-A<br>0.60740<br>0.11801<br>-0.28550<br>0.15437  | 5.7342 eV | 216.22 nm | f=0.0187 | <S**2>=0.000 |  |
| Excited State 14:<br>103 ->112<br>109 ->114<br>110 ->113              | Singlet-A<br>0.29530<br>-0.15022<br>0.59213             | 5.8451 eV | 212.12 nm | f=0.1772 | <S**2>=0.000 |  |
| Excited State 15:<br>102 ->112<br>109 ->113<br>110 ->114<br>111 ->116 | Singlet-A<br>0.50749<br>0.20844<br>0.38736<br>0.17236   | 5.8610 eV | 211.54 nm | f=0.0048 | <S**2>=0.000 |  |
| Excited State 16:<br>103 ->113<br>108 ->113<br>110 ->115              | Singlet-A<br>0.14151<br>-0.39332<br>0.54948             | 6.0315 eV | 205.56 nm | f=0.0087 | <S**2>=0.000 |  |
| Excited State 17:<br>101 ->112                                        | Singlet-A<br>0.67723                                    | 6.0445 eV | 205.12 nm | f=0.0011 | <S**2>=0.000 |  |
| Excited State 18:<br>97 ->112<br>98 ->112                             | Singlet-A<br>0.12098<br>-0.21037                        | 6.0808 eV | 203.89 nm | f=0.0008 | <S**2>=0.000 |  |

|               |           |           |           |           |          |              |
|---------------|-----------|-----------|-----------|-----------|----------|--------------|
|               | 99 ->112  | -0.13559  |           |           |          |              |
|               | 100 ->112 | 0.14269   |           |           |          |              |
|               | 104 ->113 | -0.11106  |           |           |          |              |
|               | 106 ->113 | 0.59136   |           |           |          |              |
|               | 107 ->113 | -0.14578  |           |           |          |              |
| Excited State | 19:       | Singlet-A | 6.1332 eV | 202.15 nm | f=0.0010 | <S**2>=0.000 |
|               | 96 ->112  | 0.11528   |           |           |          |              |
|               | 97 ->112  | -0.21659  |           |           |          |              |
|               | 98 ->112  | 0.37361   |           |           |          |              |
|               | 99 ->112  | 0.24210   |           |           |          |              |
|               | 100 ->112 | -0.25780  |           |           |          |              |
|               | 106 ->113 | 0.28243   |           |           |          |              |
|               | 107 ->113 | -0.10275  |           |           |          |              |
|               | 109 ->113 | -0.10428  |           |           |          |              |
|               | 111 ->116 | -0.20355  |           |           |          |              |
| Excited State | 20:       | Singlet-A | 6.1374 eV | 202.01 nm | f=0.0002 | <S**2>=0.000 |
|               | 98 ->112  | 0.14266   |           |           |          |              |
|               | 102 ->112 | -0.11227  |           |           |          |              |
|               | 106 ->113 | 0.13224   |           |           |          |              |
|               | 109 ->113 | 0.28092   |           |           |          |              |
|               | 110 ->114 | -0.24328  |           |           |          |              |
|               | 111 ->116 | 0.52602   |           |           |          |              |

<sup>1</sup> The 111st orbital is the HOMO, and the 112nd orbital is the LUMO.

## Anthracene <sup>2</sup>

|               |          |             |           |           |          |              |
|---------------|----------|-------------|-----------|-----------|----------|--------------|
| Excited State | 1:       | Singlet-B1U | 3.2757 eV | 378.50 nm | f=0.0583 | <S**2>=0.000 |
|               | 47 -> 48 | 0.69994     |           |           |          |              |
| Excited State | 2:       | Singlet-B2U | 3.9082 eV | 317.24 nm | f=0.0017 | <S**2>=0.000 |
|               | 46 -> 48 | 0.51330     |           |           |          |              |
|               | 47 -> 49 | 0.48418     |           |           |          |              |
| Excited State | 3:       | Singlet-B3G | 4.5890 eV | 270.18 nm | f=0.0000 | <S**2>=0.000 |
|               | 45 -> 48 | 0.58568     |           |           |          |              |
|               | 47 -> 50 | -0.39218    |           |           |          |              |
| Excited State | 4:       | Singlet-B3G | 4.9913 eV | 248.40 nm | f=0.0000 | <S**2>=0.000 |
|               | 45 -> 48 | 0.38351     |           |           |          |              |
|               | 47 -> 50 | 0.57878     |           |           |          |              |

|               |          |             |           |           |          |                                   |
|---------------|----------|-------------|-----------|-----------|----------|-----------------------------------|
| Excited State | 5:       | Singlet-B2U | 5.3101 eV | 233.49 nm | f=1.9082 | $\langle S^{**2} \rangle = 0.000$ |
|               | 46 -> 48 | -0.48671    |           |           |          |                                   |
|               | 47 -> 49 | 0.51584     |           |           |          |                                   |
| Excited State | 6:       | Singlet-B1U | 5.5305 eV | 224.18 nm | f=0.0000 | $\langle S^{**2} \rangle = 0.000$ |
|               | 44 -> 48 | 0.50401     |           |           |          |                                   |
|               | 47 -> 51 | -0.49556    |           |           |          |                                   |
| Excited State | 7:       | Singlet-AG  | 5.6006 eV | 221.38 nm | f=0.0000 | $\langle S^{**2} \rangle = 0.000$ |
|               | 43 -> 48 | 0.32331     |           |           |          |                                   |
|               | 45 -> 49 | 0.48127     |           |           |          |                                   |
|               | 46 -> 50 | 0.36557     |           |           |          |                                   |
|               | 47 -> 52 | 0.16793     |           |           |          |                                   |
| Excited State | 8:       | Singlet-B1U | 5.8890 eV | 210.54 nm | f=0.0797 | $\langle S^{**2} \rangle = 0.000$ |
|               | 45 -> 50 | -0.21243    |           |           |          |                                   |
|               | 46 -> 49 | 0.65523     |           |           |          |                                   |
| Excited State | 9:       | Singlet-AG  | 5.9804 eV | 207.32 nm | f=0.0000 | $\langle S^{**2} \rangle = 0.000$ |
|               | 43 -> 48 | 0.54220     |           |           |          |                                   |
|               | 45 -> 49 | -0.10877    |           |           |          |                                   |
|               | 46 -> 50 | -0.40813    |           |           |          |                                   |
|               | 47 -> 52 | 0.16094     |           |           |          |                                   |
| Excited State | 10:      | Singlet-B3U | 6.1351 eV | 202.09 nm | f=0.0000 | $\langle S^{**2} \rangle = 0.000$ |
|               | 42 -> 48 | 0.70256     |           |           |          |                                   |
| Excited State | 11:      | Singlet-B1U | 6.2322 eV | 198.94 nm | f=0.0215 | $\langle S^{**2} \rangle = 0.000$ |
|               | 44 -> 48 | 0.47371     |           |           |          |                                   |
|               | 46 -> 49 | 0.15065     |           |           |          |                                   |
|               | 47 -> 51 | 0.48563     |           |           |          |                                   |
| Excited State | 12:      | Singlet-AG  | 6.3039 eV | 196.68 nm | f=0.0000 | $\langle S^{**2} \rangle = 0.000$ |
|               | 45 -> 49 | -0.40284    |           |           |          |                                   |
|               | 46 -> 50 | 0.30280     |           |           |          |                                   |
|               | 47 -> 52 | 0.49347     |           |           |          |                                   |
| Excited State | 13:      | Singlet-AU  | 6.3596 eV | 194.96 nm | f=0.0000 | $\langle S^{**2} \rangle = 0.000$ |
|               | 41 -> 48 | 0.70214     |           |           |          |                                   |
| Excited State | 14:      | Singlet-B2U | 6.6911 eV | 185.30 nm | f=0.0003 | $\langle S^{**2} \rangle = 0.000$ |
|               | 43 -> 50 | -0.10240    |           |           |          |                                   |
|               | 44 -> 49 | 0.47474     |           |           |          |                                   |

|               |          |             |           |           |          |                                  |  |
|---------------|----------|-------------|-----------|-----------|----------|----------------------------------|--|
|               | 46 -> 51 | 0.50266     |           |           |          |                                  |  |
| Excited State | 15:      | Singlet-B1G | 6.7419 eV | 183.90 nm | f=0.0000 | $\langle S^{*2} \rangle = 0.000$ |  |
|               | 40 -> 48 | 0.69515     |           |           |          |                                  |  |
|               | 42 -> 50 | -0.11370    |           |           |          |                                  |  |
| Excited State | 16:      | Singlet-B1U | 6.9606 eV | 178.12 nm | f=0.2741 | $\langle S^{*2} \rangle = 0.000$ |  |
|               | 44 -> 48 | -0.10407    |           |           |          |                                  |  |
|               | 45 -> 50 | 0.66137     |           |           |          |                                  |  |
|               | 46 -> 49 | 0.17551     |           |           |          |                                  |  |
| Excited State | 17:      | Singlet-B2G | 7.1017 eV | 174.58 nm | f=0.0000 | $\langle S^{*2} \rangle = 0.000$ |  |
|               | 47 -> 53 | 0.69765     |           |           |          |                                  |  |
| Excited State | 18:      | Singlet-AU  | 7.2093 eV | 171.98 nm | f=0.0000 | $\langle S^{*2} \rangle = 0.000$ |  |
|               | 45 -> 53 | -0.10322    |           |           |          |                                  |  |
|               | 47 -> 54 | 0.69749     |           |           |          |                                  |  |
| Excited State | 19:      | Singlet-B2U | 7.2343 eV | 171.38 nm | f=0.0012 | $\langle S^{*2} \rangle = 0.000$ |  |
|               | 39 -> 48 | 0.46840     |           |           |          |                                  |  |
|               | 44 -> 49 | 0.34131     |           |           |          |                                  |  |
|               | 46 -> 51 | -0.39207    |           |           |          |                                  |  |
| Excited State | 20:      | Singlet-B3G | 7.2797 eV | 170.32 nm | f=0.0000 | $\langle S^{*2} \rangle = 0.000$ |  |
|               | 43 -> 49 | 0.64138     |           |           |          |                                  |  |
|               | 44 -> 50 | 0.11798     |           |           |          |                                  |  |
|               | 45 -> 51 | 0.19474     |           |           |          |                                  |  |
|               | 46 -> 52 | -0.18558    |           |           |          |                                  |  |

<sup>2</sup> The 47th orbital is the HOMO, and the 48th orbital is the LUMO.

**Table S4.** Transition energies, wavelengths and oscillator strengths of the transitions of the optimized structures of the S<sub>1</sub> states of **1** and anthracene.

**Compound 1**<sup>1</sup>

|               |           |           |           |           |          |              |
|---------------|-----------|-----------|-----------|-----------|----------|--------------|
| Excited State | 1:        | Singlet-A | 2.6333 eV | 470.84 nm | f=0.1559 | <S**2>=0.000 |
|               | 111 ->112 | 0.70569   |           |           |          |              |
| Excited State | 2:        | Singlet-A | 3.6546 eV | 339.25 nm | f=0.0099 | <S**2>=0.000 |
|               | 110 ->112 | 0.54684   |           |           |          |              |
|               | 111 ->113 | 0.44544   |           |           |          |              |
| Excited State | 3:        | Singlet-A | 3.9745 eV | 311.95 nm | f=0.0000 | <S**2>=0.000 |
|               | 109 ->112 | 0.67190   |           |           |          |              |
|               | 111 ->114 | 0.20758   |           |           |          |              |
| Excited State | 4:        | Singlet-A | 4.3041 eV | 288.06 nm | f=0.0159 | <S**2>=0.000 |
|               | 106 ->112 | 0.30394   |           |           |          |              |
|               | 107 ->112 | 0.19221   |           |           |          |              |
|               | 108 ->112 | 0.58313   |           |           |          |              |
|               | 111 ->115 | 0.14617   |           |           |          |              |
| Excited State | 5:        | Singlet-A | 4.3455 eV | 285.31 nm | f=0.0182 | <S**2>=0.000 |
|               | 106 ->112 | -0.39338  |           |           |          |              |
|               | 107 ->112 | -0.45036  |           |           |          |              |
|               | 108 ->112 | 0.33462   |           |           |          |              |
|               | 111 ->115 | 0.12535   |           |           |          |              |
| Excited State | 6:        | Singlet-A | 4.4559 eV | 278.24 nm | f=0.0046 | <S**2>=0.000 |
|               | 106 ->112 | -0.47896  |           |           |          |              |
|               | 107 ->112 | 0.50040   |           |           |          |              |
| Excited State | 7:        | Singlet-A | 4.5651 eV | 271.59 nm | f=0.0002 | <S**2>=0.000 |
|               | 109 ->112 | 0.19745   |           |           |          |              |
|               | 111 ->114 | -0.66529  |           |           |          |              |
| Excited State | 8:        | Singlet-A | 4.6094 eV | 268.98 nm | f=0.0488 | <S**2>=0.000 |
|               | 103 ->112 | -0.14065  |           |           |          |              |
|               | 105 ->112 | -0.20588  |           |           |          |              |
|               | 108 ->112 | -0.17703  |           |           |          |              |
|               | 111 ->113 | -0.12724  |           |           |          |              |
|               | 111 ->115 | 0.61248   |           |           |          |              |
| Excited State | 9:        | Singlet-A | 4.8611 eV | 255.06 nm | f=0.2628 | <S**2>=0.000 |

|               |           |           |           |           |          |              |
|---------------|-----------|-----------|-----------|-----------|----------|--------------|
|               | 103 ->112 | -0.14021  |           |           |          |              |
|               | 105 ->112 | 0.55474   |           |           |          |              |
|               | 110 ->112 | -0.21891  |           |           |          |              |
|               | 111 ->113 | 0.25910   |           |           |          |              |
|               | 111 ->115 | 0.22243   |           |           |          |              |
| Excited State | 10:       | Singlet-A | 4.9050 eV | 252.77 nm | f=0.8312 | <S**2>=0.000 |
|               | 105 ->112 | 0.37149   |           |           |          |              |
|               | 110 ->112 | 0.37369   |           |           |          |              |
|               | 111 ->113 | -0.46001  |           |           |          |              |
| Excited State | 11:       | Singlet-A | 5.0554 eV | 245.25 nm | f=0.0062 | <S**2>=0.000 |
|               | 104 ->112 | 0.68691   |           |           |          |              |
|               | 106 ->112 | -0.12361  |           |           |          |              |
| Excited State | 12:       | Singlet-A | 5.3348 eV | 232.41 nm | f=0.0011 | <S**2>=0.000 |
|               | 102 ->112 | -0.52598  |           |           |          |              |
|               | 109 ->113 | 0.28346   |           |           |          |              |
|               | 110 ->114 | -0.15353  |           |           |          |              |
|               | 111 ->116 | 0.31555   |           |           |          |              |
| Excited State | 13:       | Singlet-A | 5.4069 eV | 229.31 nm | f=0.0572 | <S**2>=0.000 |
|               | 103 ->112 | 0.65954   |           |           |          |              |
|               | 111 ->115 | 0.17861   |           |           |          |              |
| Excited State | 14:       | Singlet-A | 5.7194 eV | 216.78 nm | f=0.0012 | <S**2>=0.000 |
|               | 101 ->112 | 0.57860   |           |           |          |              |
|               | 102 ->112 | 0.18747   |           |           |          |              |
|               | 109 ->113 | 0.20989   |           |           |          |              |
|               | 110 ->114 | -0.24248  |           |           |          |              |
| Excited State | 15:       | Singlet-A | 5.7503 eV | 215.61 nm | f=0.0006 | <S**2>=0.000 |
|               | 101 ->112 | 0.34657   |           |           |          |              |
|               | 102 ->112 | -0.20737  |           |           |          |              |
|               | 109 ->113 | -0.39346  |           |           |          |              |
|               | 110 ->114 | 0.36641   |           |           |          |              |
|               | 111 ->116 | 0.18821   |           |           |          |              |
| Excited State | 16:       | Singlet-A | 5.8242 eV | 212.88 nm | f=0.0032 | <S**2>=0.000 |
|               | 96 ->112  | 0.66483   |           |           |          |              |
|               | 99 ->112  | -0.11418  |           |           |          |              |
|               | 100 ->112 | -0.11345  |           |           |          |              |



|               |           |           |           |           |          |              |
|---------------|-----------|-----------|-----------|-----------|----------|--------------|
| Excited State | 17:       | Singlet-A | 5.8435 eV | 212.18 nm | f=0.0054 | <S**2>=0.000 |
|               | 101 ->112 | 0.12191   |           |           |          |              |
|               | 102 ->112 | -0.27532  |           |           |          |              |
|               | 109 ->113 | 0.18579   |           |           |          |              |
|               | 110 ->114 | 0.20183   |           |           |          |              |
|               | 111 ->116 | -0.55295  |           |           |          |              |
| Excited State | 18:       | Singlet-A | 5.9715 eV | 207.63 nm | f=0.0815 | <S**2>=0.000 |
|               | 109 ->114 | 0.25459   |           |           |          |              |
|               | 110 ->113 | 0.62214   |           |           |          |              |
|               | 110 ->115 | -0.13651  |           |           |          |              |
| Excited State | 19:       | Singlet-A | 6.0701 eV | 204.25 nm | f=0.0062 | <S**2>=0.000 |
|               | 103 ->113 | 0.11584   |           |           |          |              |
|               | 108 ->113 | -0.43425  |           |           |          |              |
|               | 110 ->113 | 0.14698   |           |           |          |              |
|               | 110 ->115 | 0.49294   |           |           |          |              |
| Excited State | 20:       | Singlet-A | 6.1384 eV | 201.98 nm | f=0.0032 | <S**2>=0.000 |
|               | 95 ->112  | -0.10996  |           |           |          |              |
|               | 109 ->113 | -0.14792  |           |           |          |              |
|               | 110 ->114 | -0.15055  |           |           |          |              |
|               | 111 ->117 | 0.64670   |           |           |          |              |

<sup>1</sup> The 111st orbital is the HOMO, and the 112nd orbital is the LUMO.

## Anthracene <sup>2</sup>

|               |          |             |           |           |          |              |
|---------------|----------|-------------|-----------|-----------|----------|--------------|
| Excited State | 1:       | Singlet-B1U | 2.8491 eV | 435.17 nm | f=0.0601 | <S**2>=0.000 |
|               | 47 -> 48 | 0.70468     |           |           |          |              |
| Excited State | 2:       | Singlet-B2U | 3.7782 eV | 328.16 nm | f=0.0009 | <S**2>=0.000 |
|               | 46 -> 48 | 0.51051     |           |           |          |              |
|               | 47 -> 49 | -0.48705    |           |           |          |              |
| Excited State | 3:       | Singlet-B3G | 4.2294 eV | 293.15 nm | f=0.0000 | <S**2>=0.000 |
|               | 45 -> 48 | 0.58547     |           |           |          |              |
|               | 47 -> 50 | -0.39309    |           |           |          |              |
| Excited State | 4:       | Singlet-B3G | 4.6982 eV | 263.90 nm | f=0.0000 | <S**2>=0.000 |
|               | 45 -> 48 | 0.38514     |           |           |          |              |
|               | 47 -> 50 | 0.57877     |           |           |          |              |
| Excited State | 5:       | Singlet-B2U | 5.1952 eV | 238.65 nm | f=1.9229 | <S**2>=0.000 |

|               |     |             |           |           |          |              |  |
|---------------|-----|-------------|-----------|-----------|----------|--------------|--|
|               |     | 46 -> 48    | 0.49071   |           |          |              |  |
|               |     | 47 -> 49    | 0.51402   |           |          |              |  |
| Excited State | 6:  | Singlet-B1U | 5.2358 eV | 236.80 nm | f=0.0000 | <S**2>=0.000 |  |
|               |     | 44 -> 48    | 0.53376   |           |          |              |  |
|               |     | 47 -> 51    | -0.46332  |           |          |              |  |
| Excited State | 7:  | Singlet-AG  | 5.4582 eV | 227.15 nm | f=0.0000 | <S**2>=0.000 |  |
|               |     | 43 -> 48    | 0.49780   |           |          |              |  |
|               |     | 45 -> 49    | -0.36758  |           |          |              |  |
|               |     | 46 -> 50    | 0.21930   |           |          |              |  |
|               |     | 47 -> 52    | 0.25976   |           |          |              |  |
| Excited State | 8:  | Singlet-AG  | 5.8438 eV | 212.17 nm | f=0.0000 | <S**2>=0.000 |  |
|               |     | 43 -> 48    | -0.38704  |           |          |              |  |
|               |     | 45 -> 49    | -0.33489  |           |          |              |  |
|               |     | 46 -> 50    | 0.46769   |           |          |              |  |
|               |     | 47 -> 52    | -0.13052  |           |          |              |  |
| Excited State | 9:  | Singlet-B3U | 5.8873 eV | 210.60 nm | f=0.0001 | <S**2>=0.000 |  |
|               |     | 42 -> 48    | 0.70336   |           |          |              |  |
| Excited State | 10: | Singlet-B1U | 5.9252 eV | 209.25 nm | f=0.0016 | <S**2>=0.000 |  |
|               |     | 44 -> 48    | 0.37740   |           |          |              |  |
|               |     | 45 -> 50    | 0.25179   |           |          |              |  |
|               |     | 46 -> 49    | 0.31003   |           |          |              |  |
|               |     | 47 -> 51    | 0.44194   |           |          |              |  |
| Excited State | 11: | Singlet-AU  | 6.0898 eV | 203.59 nm | f=0.0000 | <S**2>=0.000 |  |
|               |     | 41 -> 48    | 0.70242   |           |          |              |  |
| Excited State | 12: | Singlet-B1U | 6.0965 eV | 203.37 nm | f=0.0570 | <S**2>=0.000 |  |
|               |     | 44 -> 48    | -0.24640  |           |          |              |  |
|               |     | 45 -> 50    | 0.16689   |           |          |              |  |
|               |     | 46 -> 49    | 0.56710   |           |          |              |  |
|               |     | 47 -> 51    | -0.28096  |           |          |              |  |
| Excited State | 13: | Singlet-AG  | 6.1377 eV | 202.01 nm | f=0.0000 | <S**2>=0.000 |  |
|               |     | 43 -> 48    | -0.12925  |           |          |              |  |
|               |     | 45 -> 49    | 0.36276   |           |          |              |  |
|               |     | 46 -> 50    | 0.29530   |           |          |              |  |
|               |     | 47 -> 52    | 0.51194   |           |          |              |  |

|               |          |             |           |           |          |                                  |
|---------------|----------|-------------|-----------|-----------|----------|----------------------------------|
| Excited State | 14:      | Singlet-B1G | 6.5678 eV | 188.78 nm | f=0.0000 | $\langle S^{*2} \rangle = 0.000$ |
|               | 40 -> 48 | 0.69684     |           |           |          |                                  |
|               | 42 -> 50 | -0.10299    |           |           |          |                                  |
| Excited State | 15:      | Singlet-B2U | 6.7491 eV | 183.70 nm | f=0.0005 | $\langle S^{*2} \rangle = 0.000$ |
|               | 39 -> 48 | -0.12435    |           |           |          |                                  |
|               | 43 -> 50 | 0.13705     |           |           |          |                                  |
|               | 44 -> 49 | 0.50921     |           |           |          |                                  |
|               | 45 -> 52 | 0.10993     |           |           |          |                                  |
|               | 46 -> 51 | -0.43848    |           |           |          |                                  |
| Excited State | 16:      | Singlet-B1U | 6.8042 eV | 182.22 nm | f=0.3062 | $\langle S^{*2} \rangle = 0.000$ |
|               | 45 -> 50 | 0.63242     |           |           |          |                                  |
|               | 46 -> 49 | -0.25902    |           |           |          |                                  |
| Excited State | 17:      | Singlet-B2G | 6.9127 eV | 179.36 nm | f=0.0000 | $\langle S^{*2} \rangle = 0.000$ |
|               | 47 -> 53 | 0.69838     |           |           |          |                                  |
| Excited State | 18:      | Singlet-AU  | 6.9980 eV | 177.17 nm | f=0.0000 | $\langle S^{*2} \rangle = 0.000$ |
|               | 47 -> 54 | 0.69938     |           |           |          |                                  |
| Excited State | 19:      | Singlet-B2U | 7.1032 eV | 174.55 nm | f=0.0055 | $\langle S^{*2} \rangle = 0.000$ |
|               | 39 -> 48 | 0.62073     |           |           |          |                                  |
|               | 44 -> 49 | -0.10559    |           |           |          |                                  |
|               | 46 -> 51 | -0.30236    |           |           |          |                                  |
| Excited State | 20:      | Singlet-B3U | 7.2035 eV | 172.12 nm | f=0.0000 | $\langle S^{*2} \rangle = 0.000$ |
|               | 47 -> 55 | 0.70388     |           |           |          |                                  |

<sup>2</sup> The 47th orbital is the HOMO, and the 48th orbital is the LUMO.

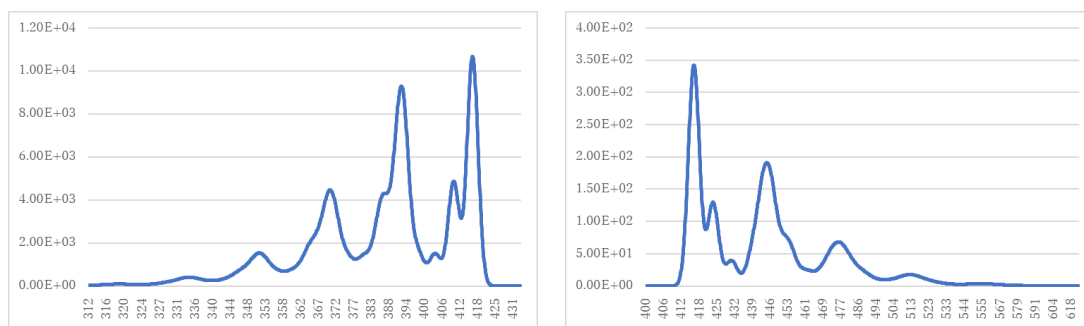

**Figure S3.** Vibrationally resolved UV/Vis (left) and fluorescence (right) spectra of anthracene calculated using the frequency data of the optimized structures of the  $S_0$  and  $S_1$  states.
